# Supplementary material
Source: Springer Nature journal article supplement (https://www.springermedizin.de/resource/supplementary/12885_2013_4381_MOESM5_ESM.pdf/9466122)

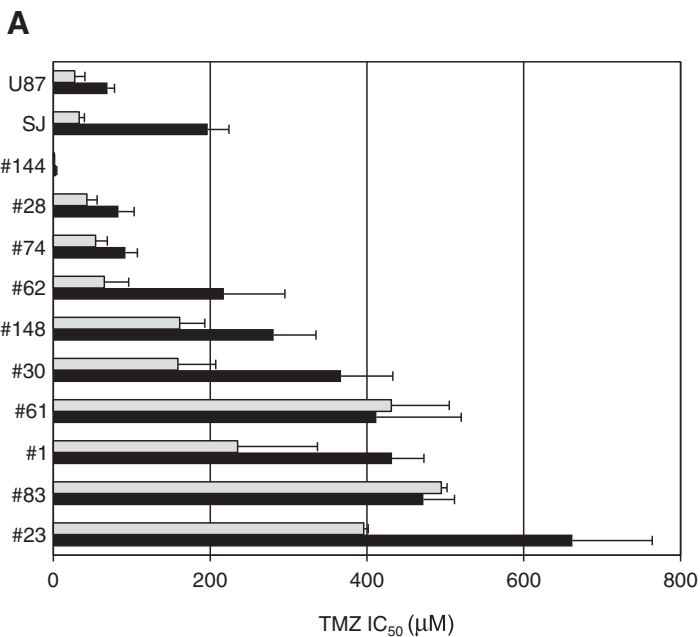

| Cell line | TMZ + PARPi CI (62.5 – 250 µM) | DRI  |
|-----------|--------------------------------|------|
| U87       | 0.57-0.76                      | 2.59 |
| SJGBM-2   | 0.34-0.63                      | 5.57 |
| #144      | 0.47-0.61*                     | 2.7  |
| #28       | 0.53-0.76                      | 1.98 |
| #74       | 0.67-0.74                      | 1.71 |
| #62       | 0.69-0.76                      | 3.35 |
| #148      | 0.53-0.68                      | 1.76 |
| #30       | 0.47-0.62                      | 2.32 |
| #61       | 1.1-1.2                        | 1.17 |
| #1        | 0.27-0.63                      | 1.84 |
| #83       | 1-1.4                          | 1    |
| #23       | 0.52-0.64                      | 1.66 |

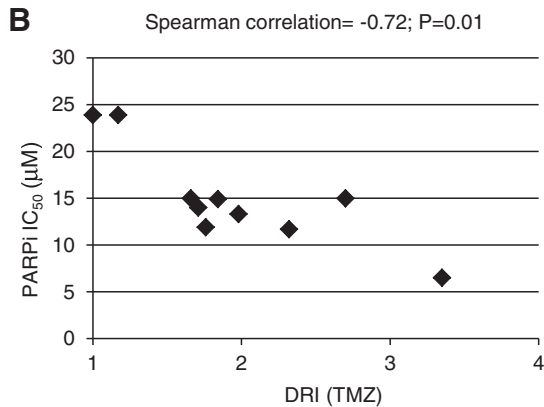

Supplement: MOESM5 [file 9466122]
